# Supplementary material for: THE AEC IN SOLID-STATE METALLURGY
Source: Royal Society of Chemistry journal article supplement (doi:10.1039/b926931b), 1951-01-01
Supplement: b926931b.pdf [file b926931b.pdf]

Electronic Supplementary Information for

## **Fabrication and Photoelectrochemical Property of Tungsten(VI) Oxide Films with a Flake-Wall Structure**

### **Experimental**

#### **Preparation of nanocrystalline WO<sub>3</sub> film<sup>1</sup>**

Nanocrystalline WO<sub>3</sub> films were prepared by a sol-gel technique using colloidal solution of tungstic acid. The colloidal solution was obtained by passing an aqueous solution of sodium tungstate through a column filled with a proton exchange resin (DOWEX 50WX2, 100-200 mesh), followed by collecting in ethanol under magnetic stirring. The solution was partially evaporated to reach a concentration of ca. 1.0 mol L<sup>-1</sup> and added by Poly(ethylene glycol) 300. After sonication of SnO<sub>2</sub>-coated glass in acetone and in 2-propanol solution, the viscous solution was deposited on the glass by a paste-squeegee method and annealed at 773 K for 30 min. This film was used as a base layer for preparation of flake-wall films (film-A and film-B). In order to prepare nanocrystalline WO<sub>3</sub> thick film (film-C), this procedure was repeated to reach the desired film thickness.

#### **Photoelectrochemical reaction**

The photoelectrochemical property of the prepared films was investigated using a three-electrode system in a cylindrical glass vessel: a platinum wire as a counter electrode and a silver/silver chloride (Ag/AgCl) electrode in 3 mol L<sup>-1</sup> sodium chloride as a reference (+0.209 V vs. SHE) were used. An aqueous solution of 0.1 mol L<sup>-1</sup> sodium sulfate (Na<sub>2</sub>SO<sub>4</sub>) was used as a supporting electrolyte. The electrode potential was swept in the anodic direction at a rate of 20 mV s<sup>-1</sup> using a potentiostat (Princeton Applied Research PARSTAT 2263). Visible light irradiation (> 400 nm) was performed using a 300-W xenon arc lamp equipped with a cut-off filter (Asahi Techno Glass L42) under magnetic stirring of the electrolyte.

#### **Calculation of IPCE value**

Monochromatic light irradiation was performed using 300-W xenon arc lamp (ILC Technology CERMAX-LX300F) equipped with a band-pass filter (Asahi Spectra Co.). The electrode potential was shifted from 0.0 to +1.5 V relative to the Ag/AgCl reference electrode. IPCE value was calculated by a following equation:

$$\text{IPCE} = 1240j/\lambda I,$$

where  $j$  is the photocurrent density at +1.2 V vs Ag/AgCl ( $\text{mA cm}^{-2}$ ),  $\lambda$  is the wavelength of the band-pass filter (nm),  $I$  is the incident photon flux ( $\text{mW cm}^{-2}$ ).  $I$  was measured using an optical power meter 3664 (Hioki).

## References

- 1 C. Santato, M. Odziemkowski, M. Ulmann and J. Augustynski, *J. Am. Chem. Soc.*, 2001, **123**, 10639-10649; C. Santato, M. Ulmann and J. Augustynski, *J. Phys. Chem. B*, 2001, **105**, 936-940.

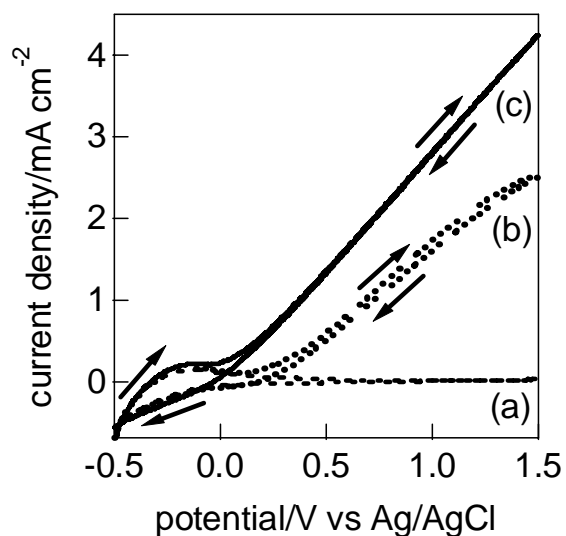

**Fig. S1** Cyclic voltammograms for WO<sub>3</sub> flake-wall film (film-B) in an aqueous solution of 0.1 mol L<sup>-1</sup> Na<sub>2</sub>SO<sub>4</sub> under (a) dark and (b) visible light irradiation, and (c) in an aqueous solution of 0.1 mol L<sup>-1</sup> Na<sub>2</sub>SO<sub>4</sub> with 10vol% methanol under visible light irradiation.

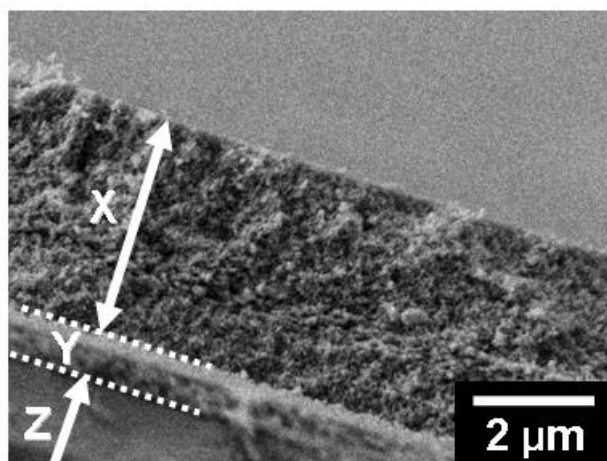

**Fig. S2** SEM cross-sectional image of nanocrystalline WO<sub>3</sub> thick film (film-C) (X: nanocrystalline WO<sub>3</sub>, Y: SnO<sub>2</sub>, and Z: glass)

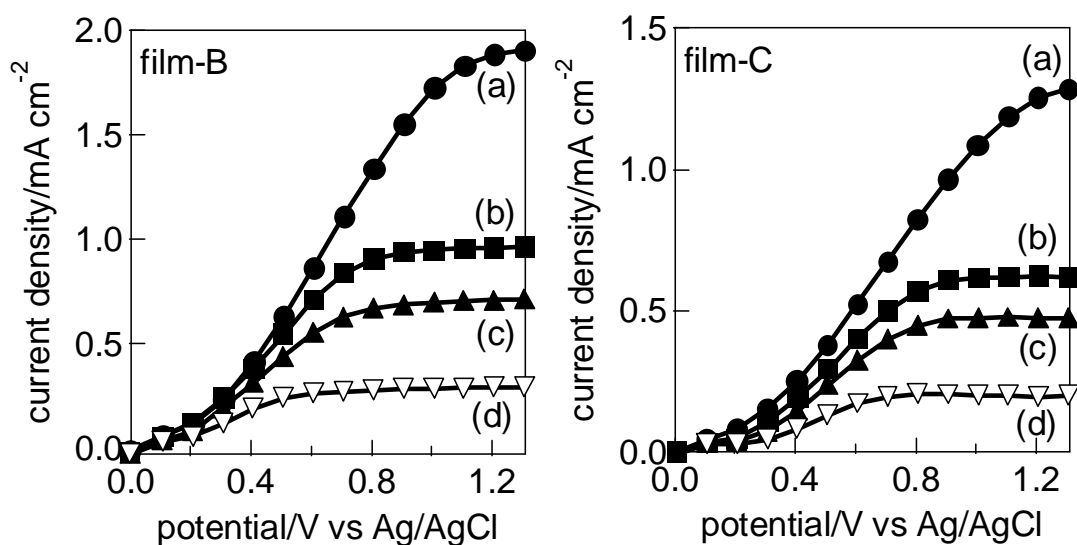

**Fig. S3** Current-potential plots for film-B and film-C in an aqueous solution of  $0.1 \text{ mol L}^{-1}$   $\text{Na}_2\text{SO}_4$  under visible light irradiation (a) without neutral density (ND) filter, with (b) ND-70%, (c) ND-50%, and (d) ND-20%.

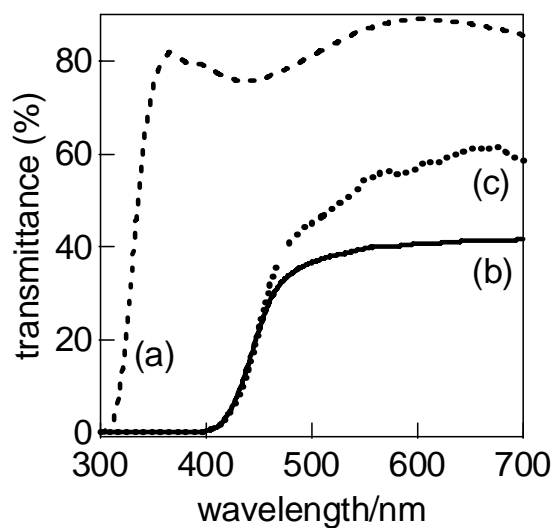

**Fig. S4** Diffuse transmittance spectra of (a)  $\text{SnO}_2$  glass, (b) film-B, and (c) film-C.
